# Supplementary material
Source: PubMed Central journal article supplement (PMC5173474)

**Appendix 1 (as supplied by the authors):** Minimum fibrosis stage required for reimbursement of simeprevir with peginterferon plus ribavirin for treatment of hepatitis C virus infection in Canadian provinces/territories

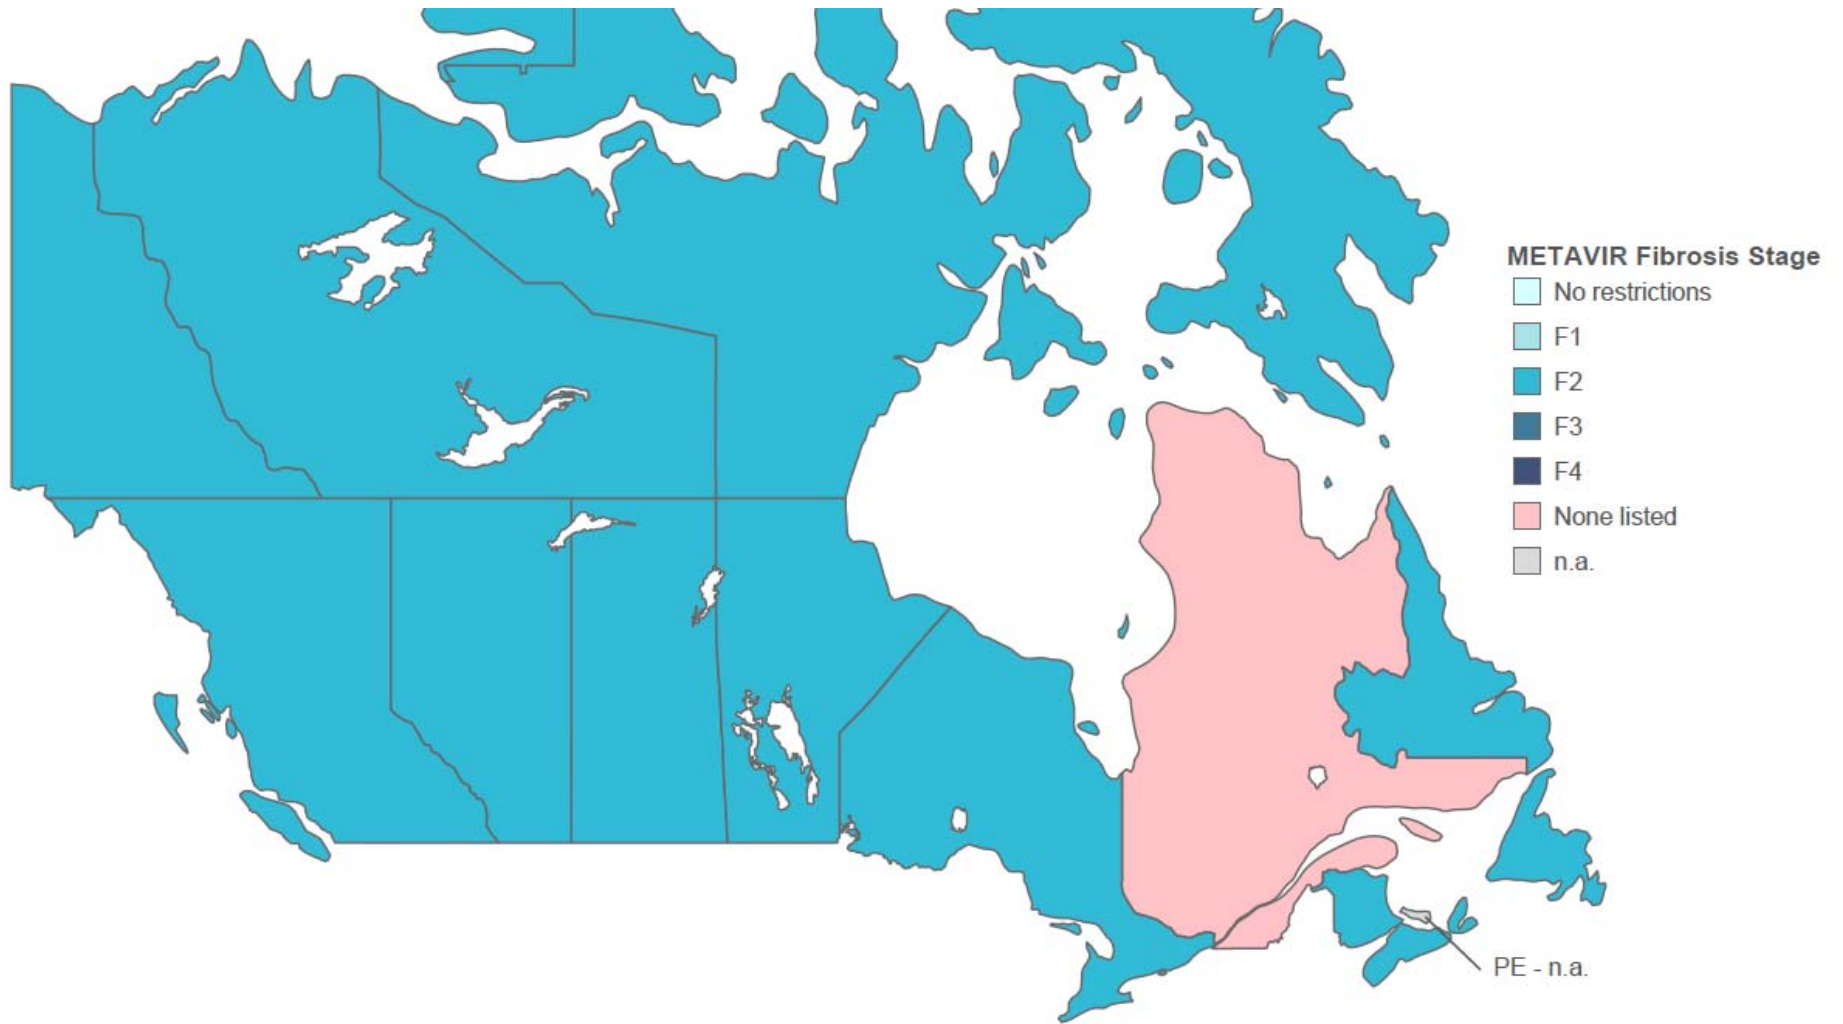

Supplement: supp_4.4.E605_2016-0008-1-at.pdf [file supp_4.4.E605_2016-0008-1-at.pdf]
