# Supplementary material
Source: PubMed Central journal article supplement (PMC5173474)

**Appendix 2 (as supplied by the authors):** Minimum fibrosis stage required for reimbursement of sofosbuvir with peginterferon and/or ribavirin for treatment of hepatitis C virus infection in Canadian provinces/territories

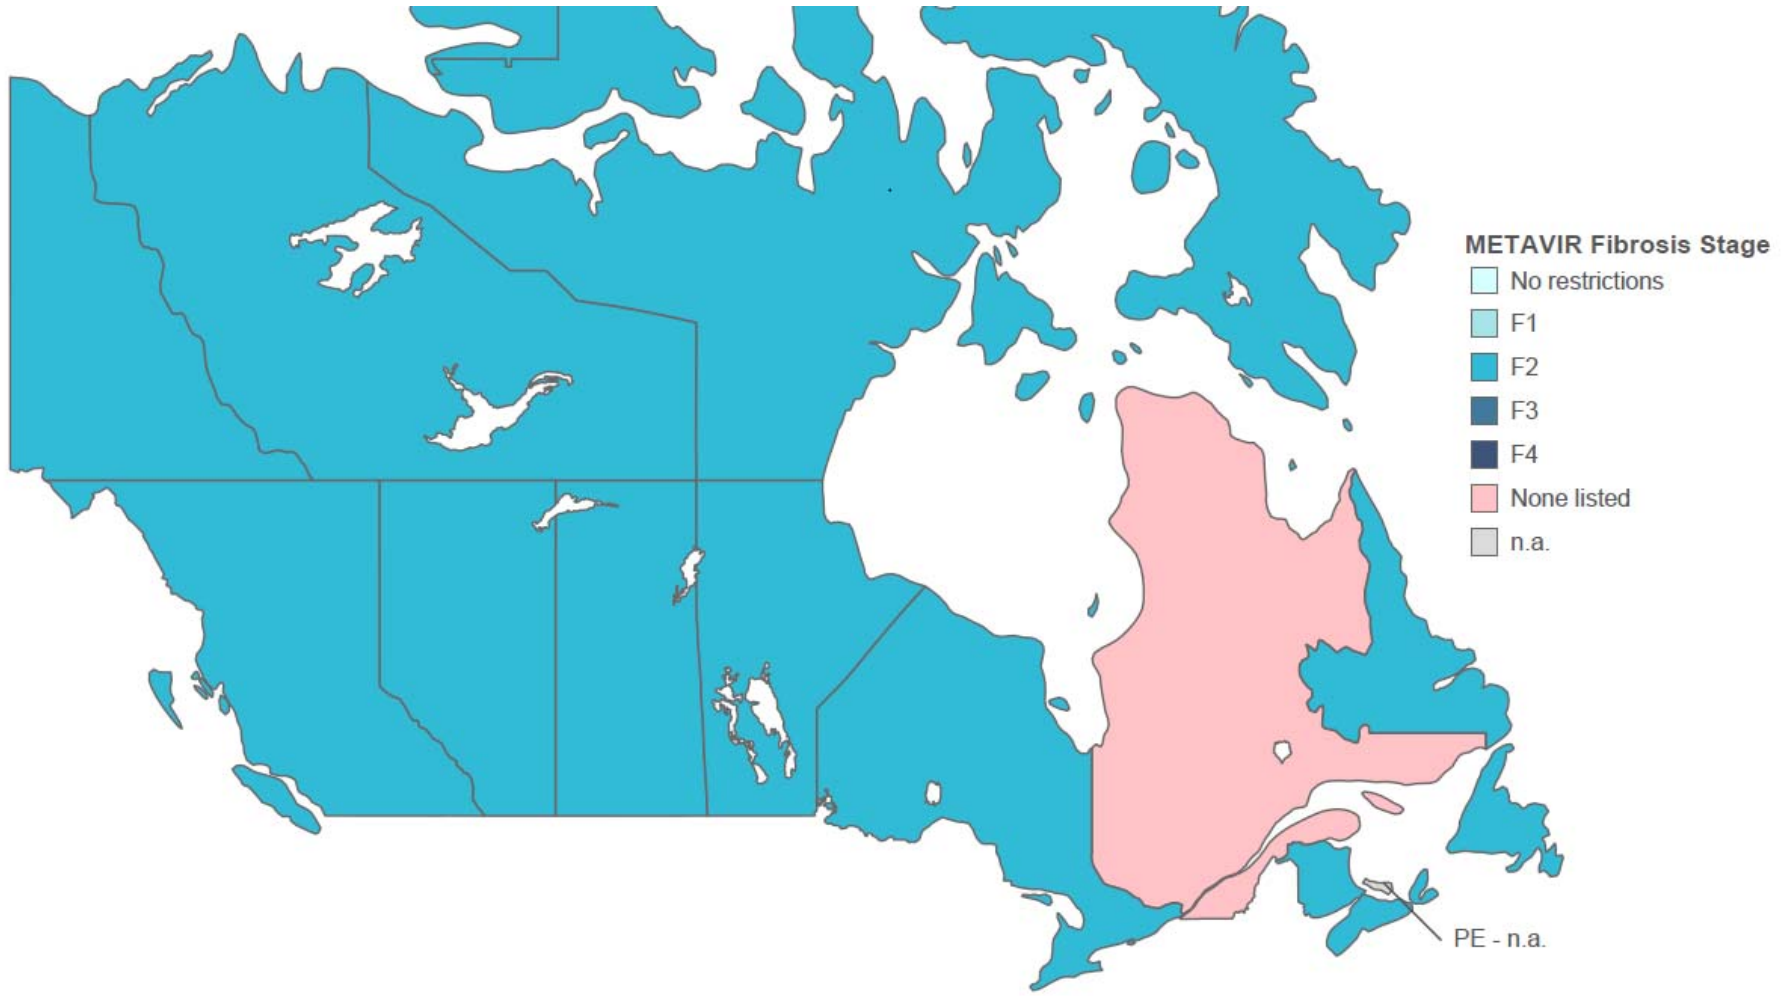

Supplement: supp_4.4.E605_2016-0008-2-at.pdf [file supp_4.4.E605_2016-0008-2-at.pdf]
